# Supplementary material for: Multiplexed chemogenetics in astrocytes and motoneurons restore blood–spinal cord barrier in ALS
Source: Life Sci Alliance. 2020 Sep 8;3(11):e201900571. doi: 10.26508/lsa.201900571 (PMC7479971; doi:10.26508/lsa.201900571)
Supplement: Supplementary file 2 [file LSA-2019-00571_TableS1.xlsx]

## Sheet: Tabelle1
Antibodies
Antigen	Host and Clone	Dilution	Company	Identifier
Aquaporin 4 (249-323)	Rabbit; (polyclonal)	1:1000	Alomone labs	Cat# AQP-004; RRID:AB_2039734
Beta-Catenin (D10A8)	Rabbit; (clone D1048)	1:100	Cell Signaling Technology	Cat# 8480; RRID:AB_11127855
ChAT	Guinea Pig (polyclonal)	1:300	Synaptic Systems	Cat# 297 015; RRID:AB_2744644
Claudin-5	Mouse; (clone 4C3C2)	1:100	Invitrogen	Cat# 35-2500; RRID:AB_87321
Collagen-IV	Rabbit	1:200	Abcam	Cat# ab6586; RRID: AB_305584
CD31-APC	Mouse; (clone 390)	1:50	Biolegend	BioLegend Cat# 102410, RRID:AB_312905
DyLight 594® Lycopersicon Esculentum (Tomato) Lectin	-	1:100	Jackson ImmunoResearch laboratories	Cat# DL-1177; RRID:AB_2336416
DREAM/KChIP3	Rabbit polyclonal	1:50	Thermo Fisher scientific	Cat#PA5-11665; RRID:AB_2132611
GFAP	Mouse	1:250	Abcam	Cat#ab7260; RRID: AB_305808
GFAP	Rabbit;(clone G-A-5)	1:400	Sigma-Aldrich	Cat#G3893; RRID: AB_477010
GFP	Chicken	1:500	Abcam	Cat#ab13970; RRID: AB_300798
KDEL	Mouse; (clone 10C3)	1:1000	Enzo Life Sciences	Cat# SPA-827F;RRID:AB_991595
LC3A (D50G8)	Rabbit	1:300	Cell Signaling Technology	Cat#4599; RRID: AB_10548192
Misfolded Human SOD1 (B8H10)	Mouse; (clone C4F6)	1:1000	Medimabs	Cat#MM-0070; RRID: AB_10015296
Phospho-CREB (Ser133)	Rabbit; (clone:87G3)	1:300	Cell Signaling Technology	Cat# 9198, RRID:AB_2561044
SQSTM1/p62	Mouse	1:500	Abcam	Cat#ab56416;RRID: AB_945626
VAChT	Goat; (clone C068C2)	1:300	Millipore	Cat#ABN100;RRID: AB_2630394
VAChT	Guinea pig	1:500	Synaptic Systems	Cat#139105;RRID: AB_10893979
Donkey anti-chicken IgG(H+L) Alexa Fluor® 488	Donkey	1:500	Jackson ImmunoResearch	Cat# 703-545-155; RRID:AB_2340375
Donkey anti-goat IgG(H+L) Alexa Fluor® 405	Donkey	1:500	Abcam	Cat#ab175664; RRID:2313502
Donkey anti-guinea pig IgG(H+L) Alexa Fluor® 633	Donkey	1:500	Invitrogen	Cat#A21105, RRID:AB_1500611
Donkey anti-mouse IgG(H+L) Alexa Fluor® 488	Donkey	1:500	Life technologies	Cat#A21202; RRID:AB_141607
Donkey anti-rabbit IgG(H+L) Alexa Fluor® 488	Donkey	1:500	Life technologies	Cat# A21206; RRID:AB_2535792
Donkey anti-rabbit IgG(H+L) Alexa Fluor® 568	Donkey	1:500	Life technologies	Cat#A10042; RRID:AB_2534017
Donkey anti-rat IgG (H+L) Alexa Fluor® 488	Donkey	1:500	Life technologies	Cat#A21208; RRID: AB_141709
Probes for in situ hybridization
RNAscope®Probe	Company			Identifier
Wnt 5a	ACD - a Bio-Techne brand			Cat#316791
Wnt 7a	ACD - a Bio-Techne brand			Cat#401121
Negative control	ACD - a Bio-Techne brand			Cat#320871
Positive control	ACD - a Bio-Techne brand			Cat#320881
